# Supplementary material for: Histone Demethylases JMJ30 and JMJ32 Modulate the Speed of Vernalization Through the Activation of FLOWERING LOCUS C in Arabidopsis thaliana
Source: Front Plant Sci. 2022 Jul 1;13:837831. doi: 10.3389/fpls.2022.837831 (PMC9284024; doi:10.3389/fpls.2022.837831)
Supplement: Supplementary file 2 [file Table_1.xlsx]

## Sheet: Sheet1
RT-PCR	Sequence (5'- XXXXX -3')	References
EIF4A1-FW	TCTTGGTGAAGCGTGATGAG	Wu et al., 2019a
EIF4A1-RV	AATCAACCTTACGCCTGGTG	Wu et al., 2019a
JMJ30-FW	GAATCACTTGGACTACCTCAATGC	Wu et al., 2019a
JMJ30-RV	CATTGGAGACGATTTATTGGTCC	Wu et al., 2019a
JMJ32-FW	GTTTCATTGTACTGTCAAGGCTGG	Wu et al., 2019a
JMJ32-RV	CATACTTGATGTCAAACTGCATGTC	Wu et al., 2019a
FLC-RT_F	CCGAACTCATGTTGAAGCTTGTTGAG	Gan et al., 2014
FLC-RT_R	CGGAGATTTGTCCAGCAGGTG	Gan et al., 2014
FLC-ChIP-P1_F	ACTATGTAGGCACGACTTTGGTAAC	Shirakawa et al., 2021
FLC-ChIP-P1_R	TGCAGAAAGAACCTCCACTCTAC	Shirakawa et al., 2021
FLC-ChIP-N1_F	CGACAAGTCACCTTCTCCAAA	Shirakawa et al., 2021
FLC-ChIP-N1_R	AGGGGGAACAAATGAAAACC	Shirakawa et al., 2021
NG-ChIP_F	TTGTAAAGTCCGATGGAGACG	Shirakawa et al., 2021
NG-ChIP_R	ACTCGGCGAGAAAGTTTGTG	Shirakawa et al., 2021
AG-ChIP_F	TGGGAGAGGAAAGATCGAAA	Yamaguchi et al., 2014
AG-ChIP_R	GCGACTTCAGCATCACAAAG	Yamaguchi et al., 2014
